# Supplementary material
Source: PubMed Central journal article supplement (PMC3517239)
Supplement: supp_tpc.112.100495_tpc100495Supplemental.pdf [file supp_tpc.112.100495_tpc100495Supplemental.pdf]

**A**

|         |     |                                                                |     |
|---------|-----|----------------------------------------------------------------|-----|
| AtXRCC4 | 366 | TAAACGGCTCTCTTGGACGTTTGAGAAGGAAGGGACTAAACTTGAGTGGAGGTGAAATG    | 425 |
| NbXRCC4 | 27  | TAAAAGGCTTTCCTGGACATTTGAGAAAGAAGGCACAAAGTTGGAATGGCGGTGAAATG    | 86  |
| AtXRCC4 | 426 | TAAACCATCAGATGATAGCAAGAAGATCACTGTTGGGATCTTGGATTTTCTTATGGAGGC   | 485 |
| NbXRCC4 | 87  | CCAACGTCTCCTAATAGCAAGAAAACACGGCAGACATCTTGGACTTTCTCATGGATGC     | 146 |
| AtXRCC4 | 486 | TAACATAAGGCTAAGTGAAGAAGTGGTGAACAAGACGAGATCTTTTGAGAAGATGAGAAG   | 545 |
| NbXRCC4 | 147 | AAACATTAGACTTAGTGACGAAGTTGTCAGTAAAACCAATCATTGAGAGGCTGAGAGA     | 206 |
| AtXRCC4 | 546 | TGAAGCTGAGAGATGTCTAGCGCAAGGTGAAAAACTCTGTGACGAAAAACAGAGTTTGA    | 605 |
| NbXRCC4 | 207 | GGAGGCTGAAAAATGTTTAAACACAAAGCGAGAAAACCTCAGCAAAGAGAAAGAAGATTTGA | 266 |
| AtXRCC4 | 606 | GAGTGCAACTTATGCAAAG                                            | 624 |
| NbXRCC4 | 267 | ATCTGCAATATATGCAAAG                                            | 285 |

**B**

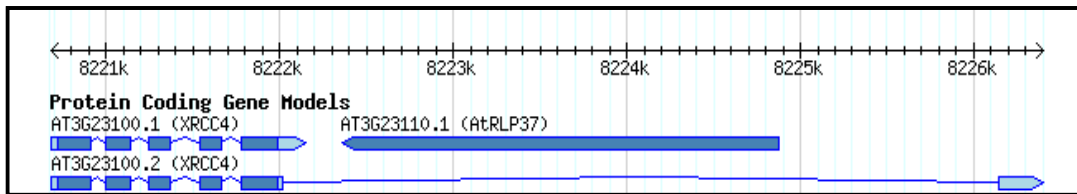

**C**

|           |     |                                                              |     |
|-----------|-----|--------------------------------------------------------------|-----|
| At3G23100 | 79  | ATCGAAACAATGGTTGAATCGGAGAAAACGAAACACACTTGTCTCCGTCTCGAAATCTCC | 138 |
| At1G61410 | 1   | ATCGAAACAATGGTTGAATCGGAGAAAACGAAACACACATGTCTCCATCTTGAAATCTCC | 60  |
| At3G23100 | 139 | GGCGCCGATCCAATTTTCGTCAAAGGCACTTGGCATAATTCTCGTTTCGATATCTCCGTC | 198 |
| At1G61410 | 61  | GGCGCCGATCCAATTTTCGTCAAAGGAACATGGTATCACTCTCGTTTCGATATCTCCGTC | 120 |
| At3G23100 | 199 | ACCGATGGTTCCTCCTCTTGGATTTGCAATGCGACGGAGGAGGAAGTGGCGGAGAGAGCA | 258 |
| At1G61410 | 121 | ACCGATGGTTCCTCCTCTTGGACTTGCAATGCGACGGAGGAGGAGGTAGCGGAGAGAGCA | 180 |
| At3G23100 | 259 | GCACAATGGGACCAGCCTGTGTGAGATATTTAAAGCTCGCCGAGCAATACTTAGGGTTT  | 318 |
| At1G61410 | 181 | G--CAATGGGACCAGCCTGTATCTGAGATTTAGAGCTCGCCGAGCAATACTTAGGGTTT  | 238 |
| At3G23100 | 319 | CAACAACCTAATTCGGTCTATAGTTTCTCCGATGCTCTAGAGGGATCTAAACGGCTCTCT | 378 |
| At1G61410 | 239 | CAGCAGCCTAATTCGGTCTATAGTTTCTCCGATGCTATTGAGGGATCTAAACGGCTCTCT | 298 |
| At3G23100 | 379 | TGGACGTTTGAGAAGGAAGGGACTAAACTTGAGTGGAGGTGAAATGTAAACCATCAGAT  | 438 |
| At1G61410 | 299 | TGGACGTTTGAGAAGGAAGGGACTAAACTTGAGTGGAGGTGAAATGTAAACCATCAGAT  | 358 |
| At3G23100 | 439 | GATAGCAAGAAGATCACTGTTGGGATCTTGGATTTTCTTATGGAGGCTAACATAAGGCTA | 498 |
| At1G61410 | 359 | GATAGCAAGAAGATCACTGTTAGGATTTTGGATTTTCTTATGGAGGCTAACATAAGGCTA | 418 |

|           |     |                                                              |     |
|-----------|-----|--------------------------------------------------------------|-----|
| At3G23100 | 499 | AGTGAAGAAGTGGTGAACAAGACGAGATCTTTTGAGAAGATGAGAAGTGAAGCTGAGAGA | 558 |
| At1G61410 | 419 | AGTGAAGAAGTTGTGAACAAGACGAGATCGTTTGAGAAGATGAAAAGTGAAGCTGAGAGA | 478 |
| At3G23100 | 559 | TGTCTAGCGCAAGGTGAAAACTCTGTGACGAAAAACAGAGTTTGAGAGTGCAACTTAT   | 618 |
| At1G61410 | 479 | TGTCTCGCGCAAGGTGAAAACTATGCGATGAAAAACAGAGTTTGAGAATGCAACTTAT   | 538 |
| At3G23100 | 619 | GCAAAGTTTCTTCTGTTTTAAATGCAAAGAAGGCAAACTGAGAGCACTAAGGGACAAA   | 678 |
| At1G61410 | 539 | GCAAAGTTCCTTCTGTTTTAAATGCAAAGAAGGCGAACTGAGAGCAGTAAGGGACAAA   | 598 |
| At3G23100 | 679 | GAAGATTCAGTGAGAGTAGTTGAGGAGGAAGAGTCGACAGACAAAGCTGAAAGCTTTGAG | 738 |
| At1G61410 | 599 | GAAGATTCAGTGAGAGCAGTTGAGGAGGAAGAGTCGACATACAAAGCTGAAAGCTTCGAG | 658 |
| At3G23100 | 739 | AGTGAAGAAGTGATGATGAGAAGAGCGAGGAAGAAGCCTCAAAAAAGGCAACAAGCAGC  | 798 |
| At1G61410 | 659 | AGTGAAGAAGTGATGATGAGCAGAGTGGGGAAGAAGCGTCAGAAAAGGCAACAAGCAGC  | 718 |
| At3G23100 | 799 | AAAGCCCGTGGCGGAAAGAGAGCTGCACGAAGCTAAGA---GA--TTGCCCTGCCGTGA  | 852 |
| At1G61410 | 719 | AAAGCCCGTGGCGGAAAGAGAGCTGCACGGAGCTAAGACTTAGAGATTCCCTGCCTTGA  | 778 |
| At3G23100 | 853 | GATTTTCAGG                                                   | 862 |
| At1G61410 | 779 | GATTT-CAGG                                                   | 787 |

## D

```

GAAGTATGTA TGAGAAGAGC GAGGAAGAAG CCTCAAAAAA GGCAACAAGC AGCAAAGCCC GTGGCGGGAA
GAGAGCTGCA CGAAGCTAAG AGATTGCCCT GCCGTGAGAT TTTCAGGTCA GAGTTCCAT TCCAAGTTTT
GTCAAACCTCA TAGCTAGGAA AATTGTTTGT CAAACCTTCT TTGGTTTAAA AAAATAATTT ACAATTTGTA
TTACTTCTGA AAGTAAATGC AATAACTTAG AGATGG
    
```

### Supplemental Figure 1. *Nicotiana benthamiana* XRCC4 Sequence Used for Virus-Induced Gene Silencing

(A) Sequence alignment between *Arabidopsis thaliana* (At3G23100) and *N. benthamiana* XRCC4 (in VIGS vector) using BLASTN function. *N. benthamiana* XRCC4 shares 72% nucleotide identity with *Arabidopsis* XRCC4.

(B) Predicted gene models for XRCC4 (At3G23100) from *Arabidopsis* genome viewer.

(C) Nucleotide sequence alignment of At3G23100 vs. At1G61410 (blastn function). Sequence in red denotes the region homologous to *N. benthamiana* XRCC4 gene sequence used for VIGS.

(D) *Arabidopsis* XRCC4 (At3G23100) sequence used for RNAi. Stop codon is indicated in red. The 3' UTR sequence is shown in blue.

**A**

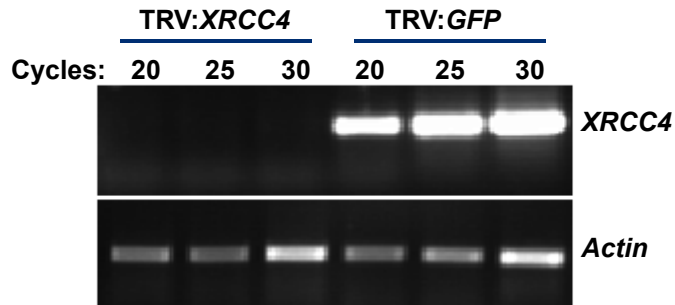

**B**

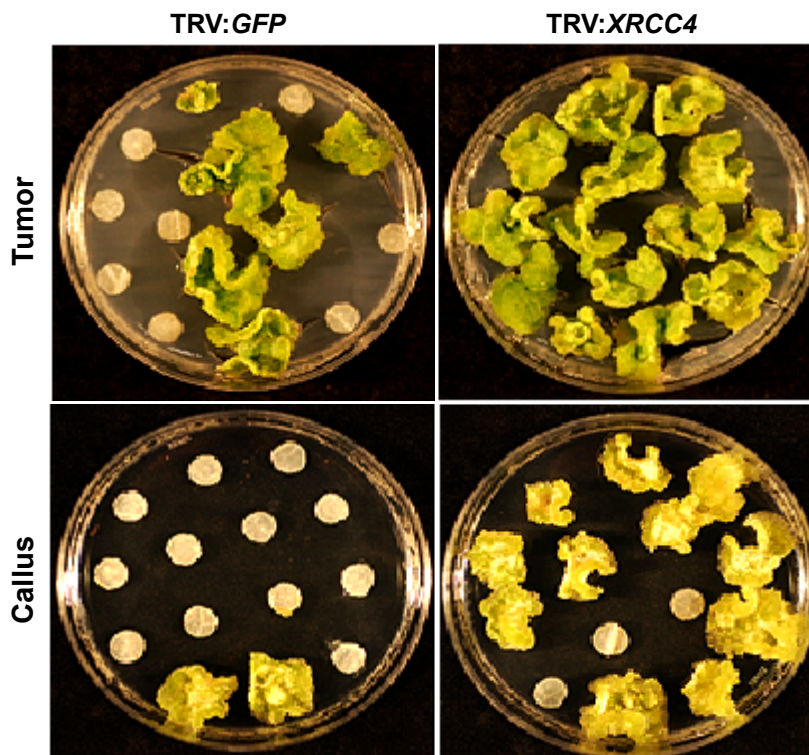

**Supplemental Figure 2. Effect of *XRCC4* Down-regulation on Stable Transformation in *Nicotiana benthamiana***

(A) RT-PCR showing VIGS-mediated reduction of *XRCC4* transcript in silenced plants. *Actin* was used as the loading control.

(B) Representative plates from tumor and callus stable transformation assays performed on leaf discs obtained from TRV:*XRCC4*-silenced and TRV:*GFP* infected control plants. Leaf discs were inoculated with either tumorigenic *A. tumefaciens* strain A348 (tumor assay) or disarmed *A. tumefaciens* GV2260 harboring *pCAS1* plasmid (callus assay). Photographs were taken after 30 days.

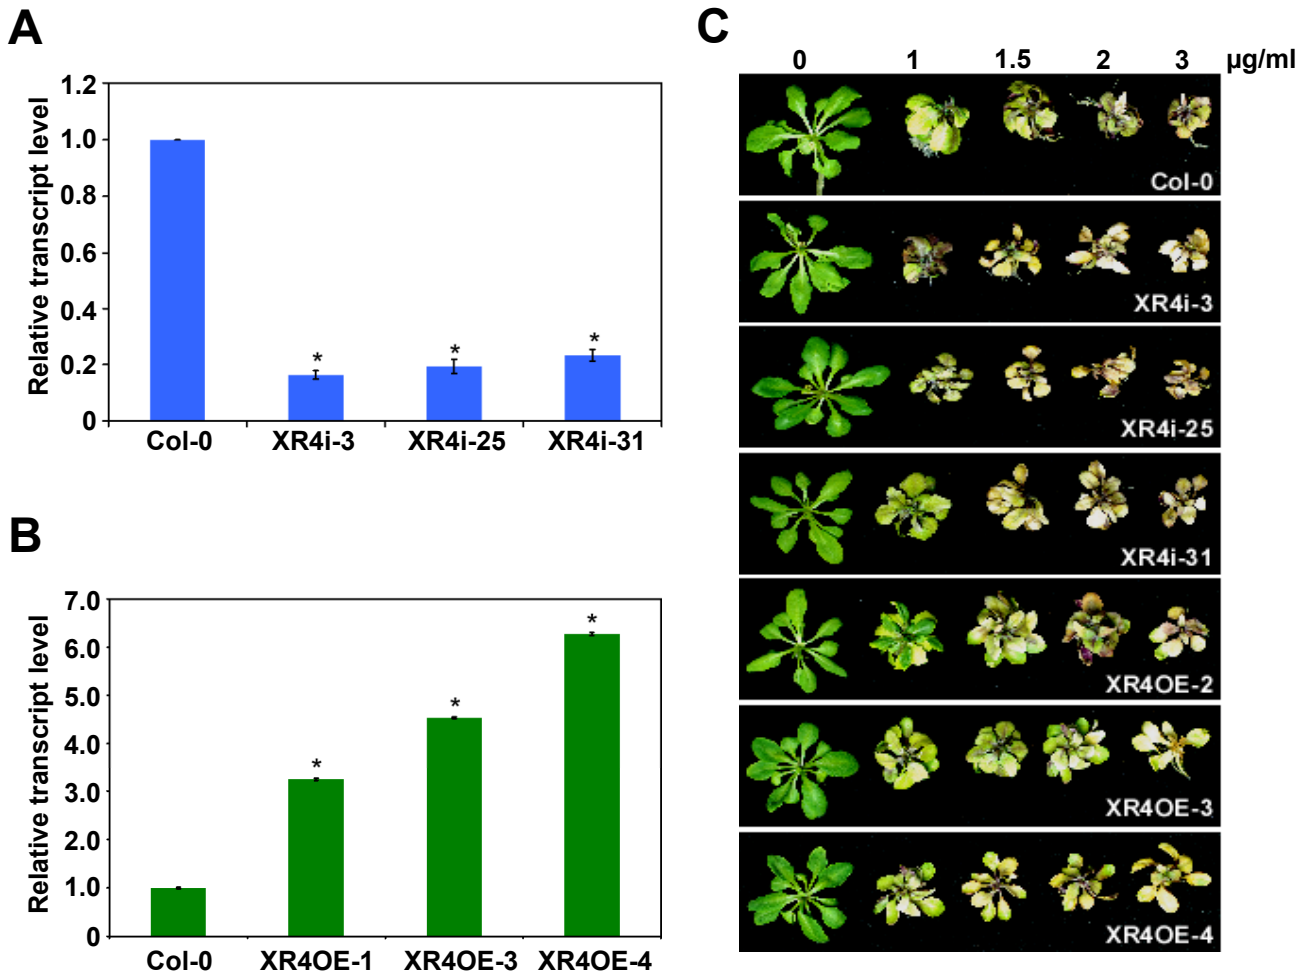

**Supplemental Figure 3. Estimation of Arabidopsis *XRCC4* Transcript Level by Quantitative RT-PCR in RNAi and Over-Expression Lines and Sensitivity of these Lines to Bleomycin**

(A) RNAi-mediated down-regulation of *XRCC4* gene expression in  $T_0$  *XRCC4* RNAi (XR4i) events. The data represent the average of three technical replicates with SD values shown as error bars. Asterisks denote significant difference in the *XRCC4* transcript level between RNAi lines versus Col-0 as determined by student's t-test ( $p < 0.05$ ).

(B) Over-expression (OE) of *XRCC4* in selected transgenic lines ( $T_0$ ) as determined by Quantitative RT-PCR. *EF1- $\alpha$*  amplification was used as internal control. Asterisks denote significant difference in the *XRCC4* transcript level between over-expression lines versus Col-0 as determined by student's t-test ( $p < 0.05$ ). Error bars denote standard deviation of three technical repeats in each of the treatments.

(C) Response of representative samples of Col-0, *XRCC4* RNAi (XR4i) and over-expression (XR4OE) lines after exposure to bleomycin at noted concentrations. Photographs were taken at 25 days after exposure.

**A**

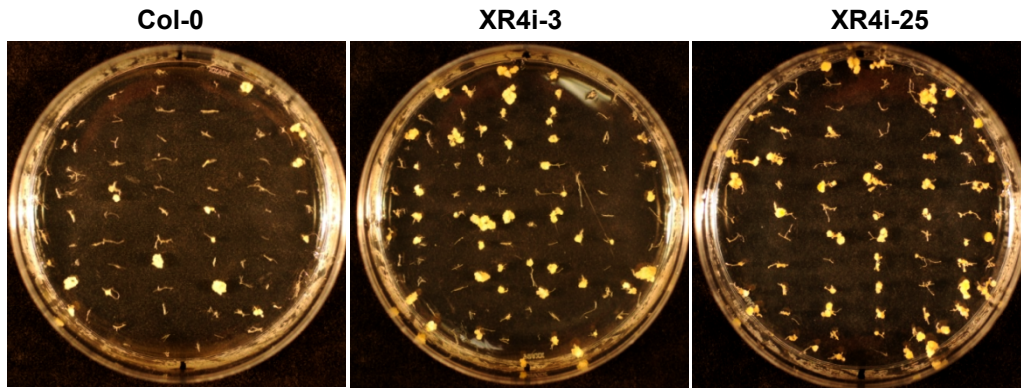

**B**

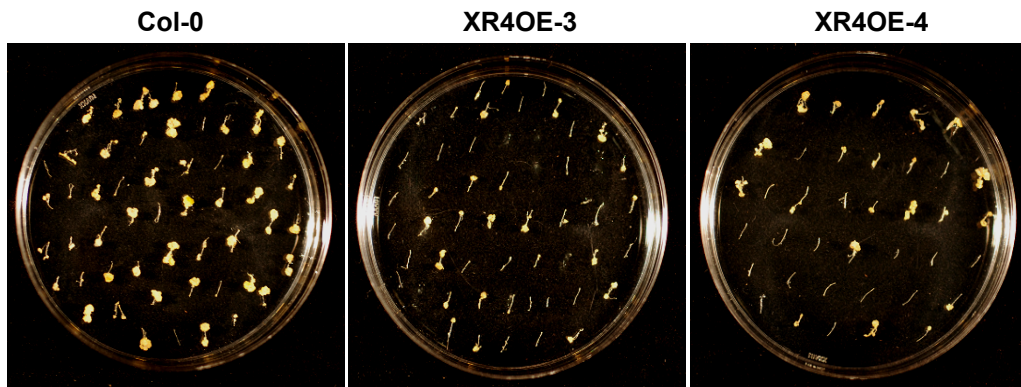

**Supplemental Figure 4. Root Callus Assay to Determine the Effect of Arabidopsis *XRCC4* Down-Regulation and Over-Expression on Stable Transformation**

(A) Representative plates of callus transformation assay from Col-0 versus *XRCC4* RNAi lines. Root segments of wild-type Col-0 and *XRCC4* RNAi (XR4i) were infected with disarmed *A. tumefaciens* strain GV3101 harboring the binary vector *pCAS1* that contains bar gene as plant selection marker. Phosphinothricin-resistant calli developing from root segments were visualized and scored four weeks after infection.

(B) Root callus assay on Col-0 and *XRCC4* over-expression (XR4OE) lines. Data on formation of phosphinothricin-resistant calli was recorded and photograph was taken four weeks after infection.

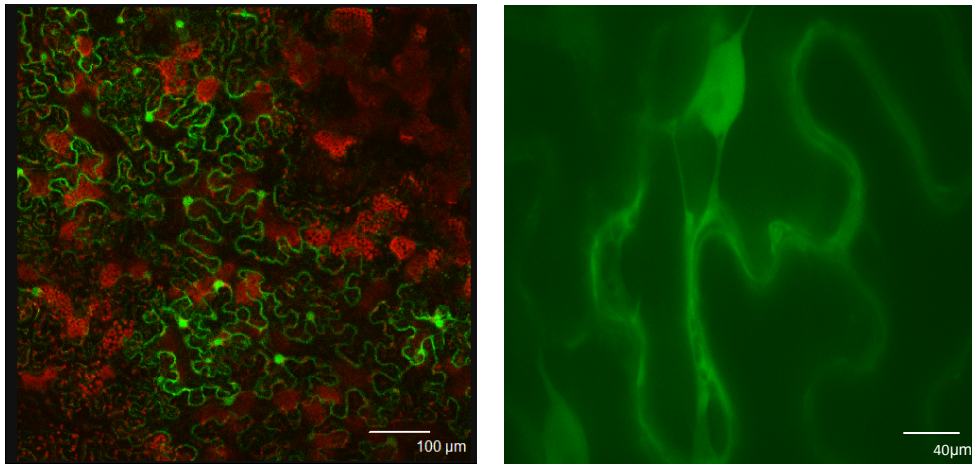

**Supplemental Figure 5. Localization of Arabidopsis XRCC4**

Nucleo-cytoplasmic localization pattern of *GFP-XRCC4* fusion observed in agroinfiltrated *N. benthamiana* leaves 48 hr post- infiltration. Pictures were taken at 20X view (left panel) and 60X view (right panel).

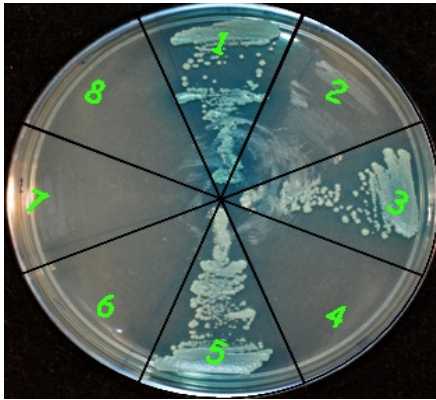

- 1-XRCC4 (Bait) + XRCC4 (Prey)
- 2- XRCC4 (bait) only
- 3- XRCC4 (Bait) + VirE2 (Prey)
- 4- VirE2 (prey) only
- 5- positive control
- 6 -negative control
- 7- XRCC4 (bait) + Rec7 empty
- 8- VirE2 (prey) + LamC

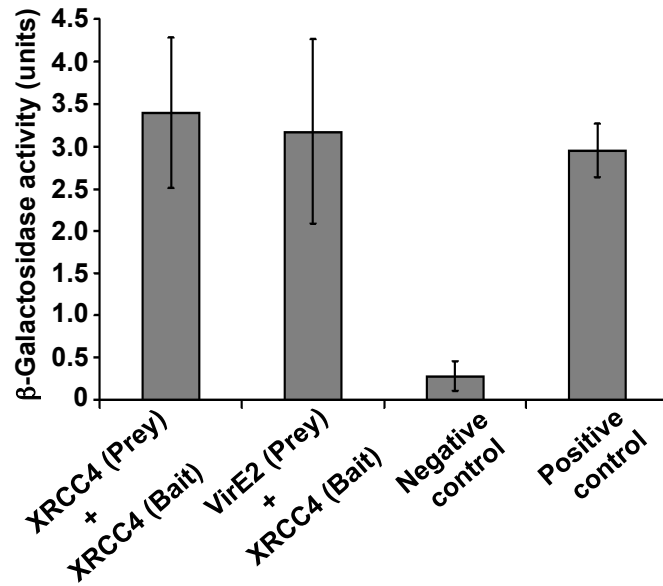

**Supplemental Figure 6. Interaction of Arabidopsis XRCC4 with *Agrobacterium* VirE2 protein**

Yeast two-hybrid assay showing XRCC4 dimerization and interaction with VirE2 (left panel) and quantification of interaction using beta-galactosidase activity assay (right panel). Error bars indicate standard deviation among three biological and three technical replicates.

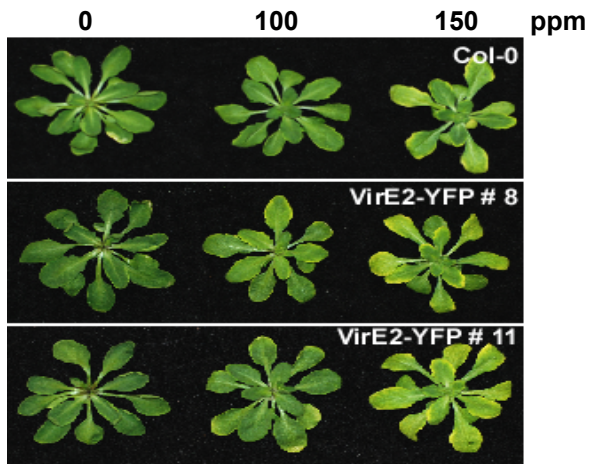

**Supplemental Figure 7. Methyl methanesulfonate (MMS) sensitivity assay for *VirE2-YFP* expressing lines.**

One-week-old healthy seedlings of Col-0 and *VirE2-YFP* expressing lines were transferred to MS medium containing MMS at 100 and 150 ppm. Photographs were taken after 21 days.



**Supplemental Table 1. List of Primers Used in VIGS and Arabidopsis Studies**

| <b>Gene</b>               | <b>Forward Primer (5'-3')</b>                            | <b>Reverse Primer (5'-3')</b>                             |
|---------------------------|----------------------------------------------------------|-----------------------------------------------------------|
| Nb- <i>XRCC4</i> *        | ggggacaagttgtacaaaaagcaggctCACT<br>CCATTGCGGTGGCTGCCGCT  | ggggaccactttgtacaagaaagctgggtAGTGC<br>CAACATCATCATTCTCCAC |
| At- <i>XRCC4</i> RNAi*    | ggggacaagttgtacaaaaagcaggctGAAC<br>TGATGATGAGAAGAGCGAGGA | ggggaccactttgtacaagaaagctgggtCCATC<br>TCTAAGTTATTGCATTTAC |
| At- <i>XRCC4</i> OE*      | ggggacaagttgtacaaaaagcaggctATGA<br>TCGGAGTTGACTCAAATCT   | ggggaccactttgtacaagaaagctgggtCCATC<br>TCTAAGTTATTGCATTTAC |
| At- <i>XRCC4</i> Realtime | GCGCACTTGGCATAATTCTCGTT                                  | TCGCATTGCAAATCCAAGAGGA                                    |

\* The sequences in lower case correspond to the attB1 and attB2 adapters at 5' end of the forward and reverse primers, respectively for GATEWAY cloning.
